# Supplementary material for: Lithocholic Acid Induces miR21, Promoting PTEN Inhibition via STAT3 and ERK-1/2 Signaling in Colorectal Cancer Cells
Source: MDPI journal article supplement (doi:10.3390/ijms221910209), 2021-09-22
Supplement: s1 [file s1]

## **Supplementary data**

# **Lithocholic acid induces miR21, promoting PTEN inhibition via STAT3 and ERK-1/2 signaling in colorectal cancer cells**

**Thinh-Thi Nguyen<sup>1,2†</sup>, Thuan-Trong Ung<sup>1,2†</sup>, Shinan Li<sup>1</sup>, Dhiraj Kumar Sah<sup>1</sup>, Sun-Young Park<sup>1</sup>, Sen Lian<sup>3\*</sup> and Young-Do Jung<sup>1\*</sup>**

<sup>1</sup>Research Institute of Medical Sciences, Chonnam National University Medical School, Gwangju 501-190, Republic of Korea

<sup>2</sup>Nanogen Pharmaceutical Biotechnology Joint Stock Company, Ho Chi Minh City 71207, Vietnam.

<sup>3</sup>Department of Biochemistry and Molecular Biology, School of Basic Medical Sciences, Southern Medical University, Guangzhou 510515, Guangdong, China

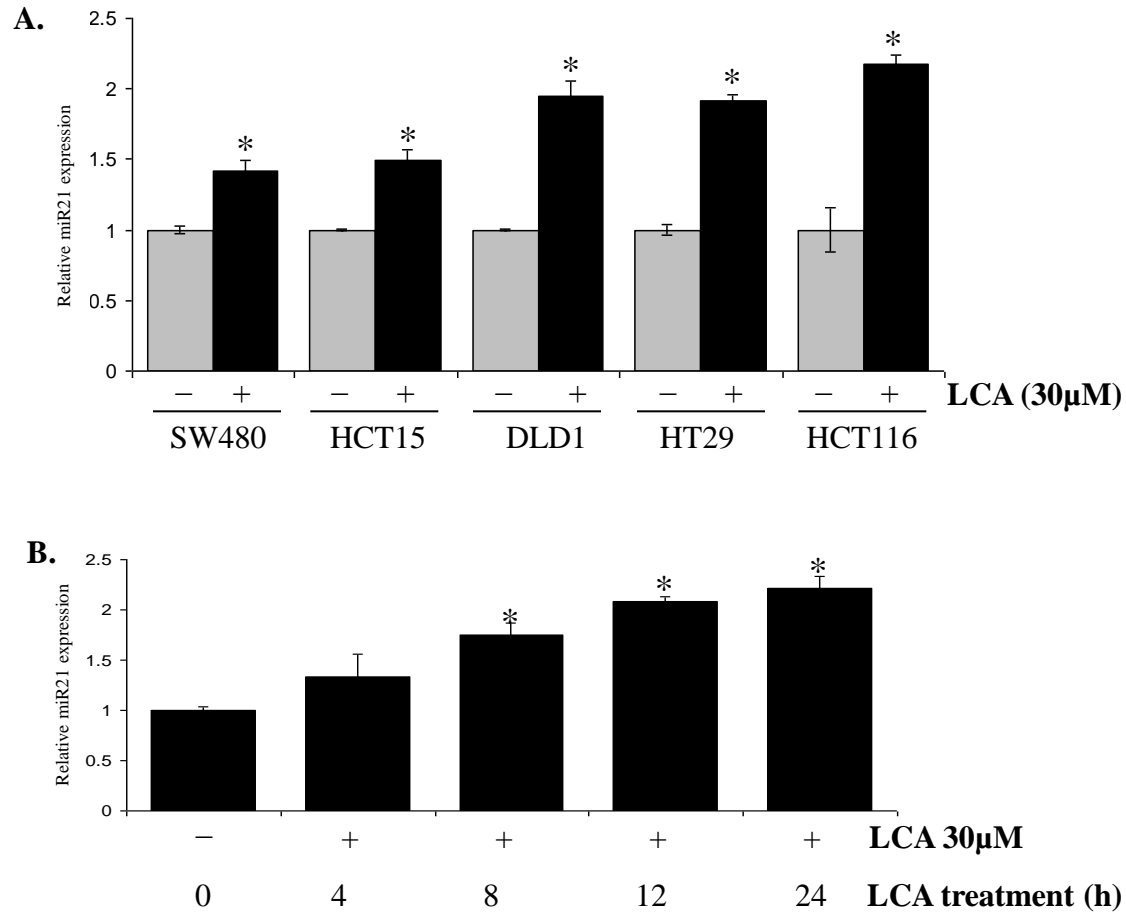

**Figure S1. LCA induces miR21 expression in colorectal cancer cell lines.** (A) Different colorectal cancer cell lines were treated with 30µM LCA for 24h and assessed miR21 expression by Realtime-PCR. (B) HCT116 cells were treated with 30µM LCA for different time periods and then checked miR21 expression by Realtime-PCR. \*  $p < 0.05$  versus control. The above data represent the means  $\pm$  SD from triplicate measurements.

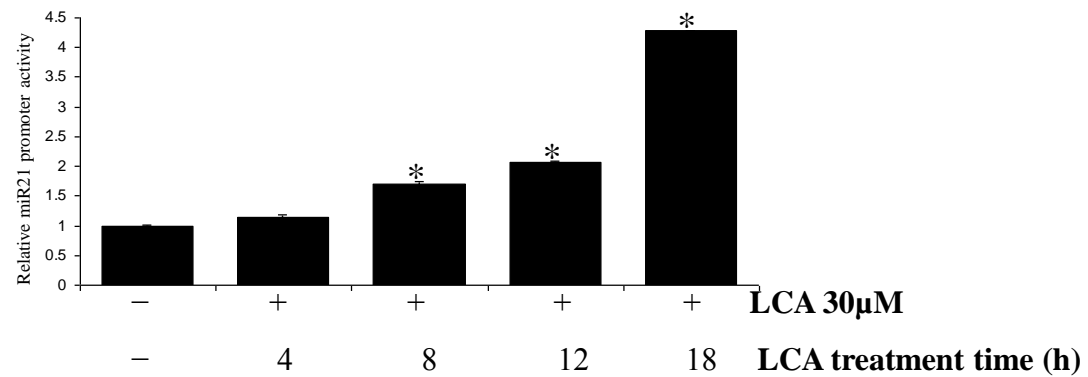

**Figure S2. LCA stimulated miR21 promoter activity by time dependence.** pGL3-miR21 promoter transfected HCT116 cells were treated with 30μM LCA for 4h–18h and then checked for miR21 promoter activation by dual-luciferase assay. \*  $p < 0.05$  versus control. The above data represent the means  $\pm$  SD from triplicate measurements.

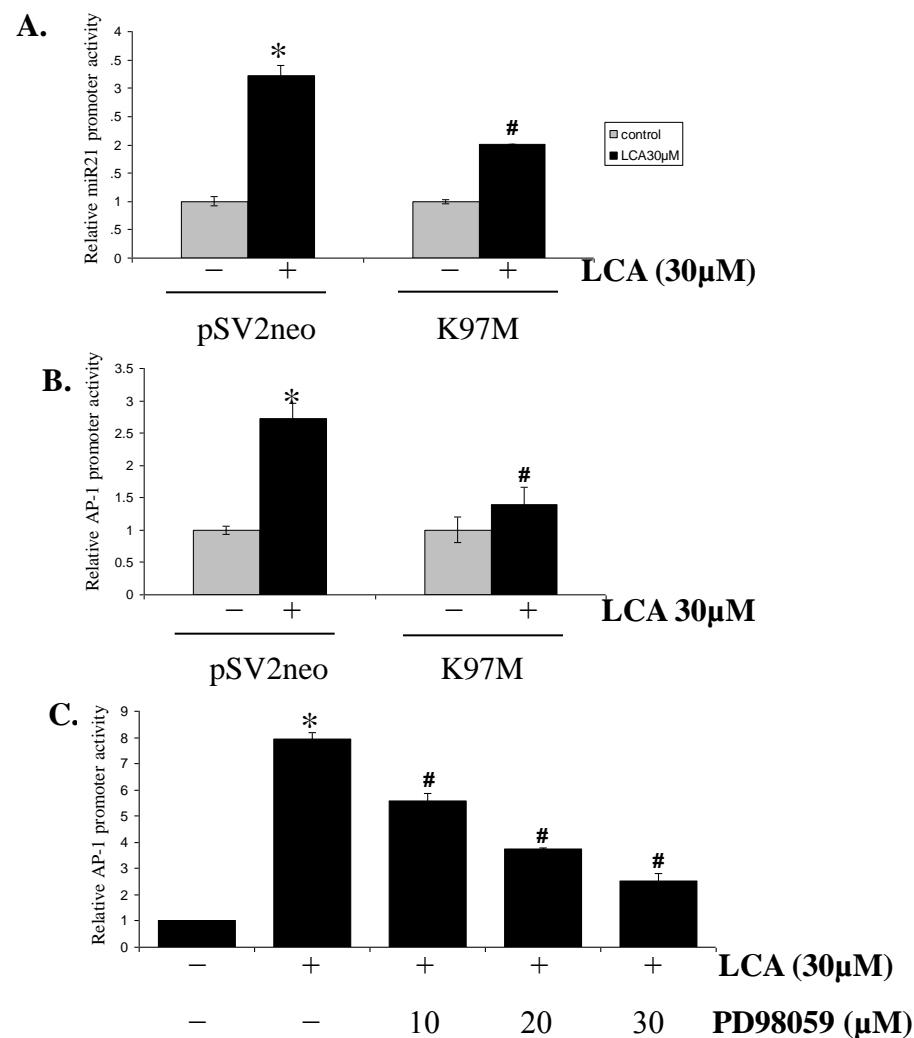

**Figure S3. Erk1/2 signaling is involved in LCA-induced miR21 through AP-1 transcription factor activation.** (A) The dominant mutant of Erk1/2 (K97M) or pSV2neo (1μg) were co-transfected into HCT116 cells with 250ng of pGL3-miR21 promoter. The cells were then treated with 30μM LCA for 18h and subjected for miR21 promoter activity checking by dual-luciferase assay. (B) The dominant mutant of Erk1/2 (K97M) or pSV2neo plasmid (1μg) were co-transfected into HCT116 cells with 250ng of pGL3-AP1 promoter. The cells were then treated with 30μM LCA for 18h and subjected for AP1 promoter activity checking by dual-luciferase assay. (C) HCT116 cells transfected with pGL3-AP1 promoter were treated with PD98059 at 10μM–30μM for 1h and then 30μM LCA for 18h. The cells were then harvested, lysed and checked for AP-1 promoter activity by dual-luciferase assay. \*:  $p < 0.05$  versus control; #:  $p < 0.05$  versus only LCA. The above data represent the means  $\pm$  SD from triplicate measurements.<sup>12</sup>

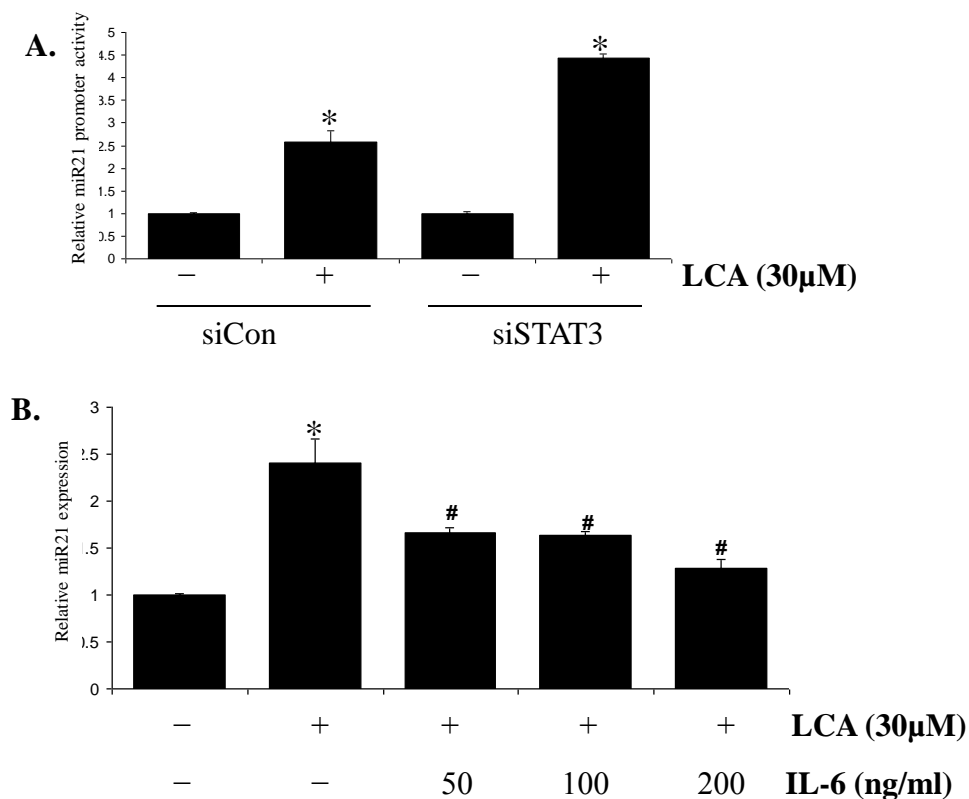

**Figure S4. STAT3 signaling is involved in LCA-induced miR21 expression in HCT116 cells.** (A) HCT116 cells transfected with siSTAT3 or siCon (50nM) were further transfected with pGL3-miR21 promoter. The cells were then treated with 30μM LCA for 18h and subjected for miR21 promoter activity by dual-luciferase assay. (B) HCT116 cells were treated with IL-6 at 50ng/ml–200ng/ml for 1h prior to LCA treatment for 24h. The cells were then harvested to extract total RNA and checked for miR21 expression. \*  $p < 0.05$  versus control; #  $p < 0.05$  versus only LCA. The above data represent the means  $\pm$  SD from triplicate measurements.

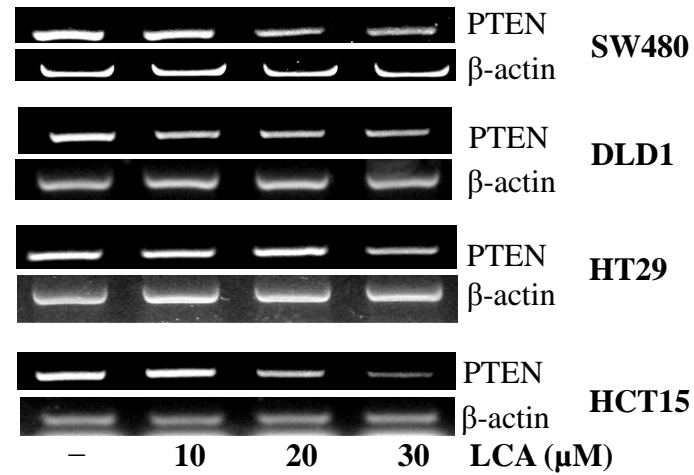

**Figure S5. LCA inhibits PTEN expression in CRC cell lines.** Different CRC cell lines treated with 10μM–30μM LCA within 24h were checked for PTEN expression by RT-PCR.

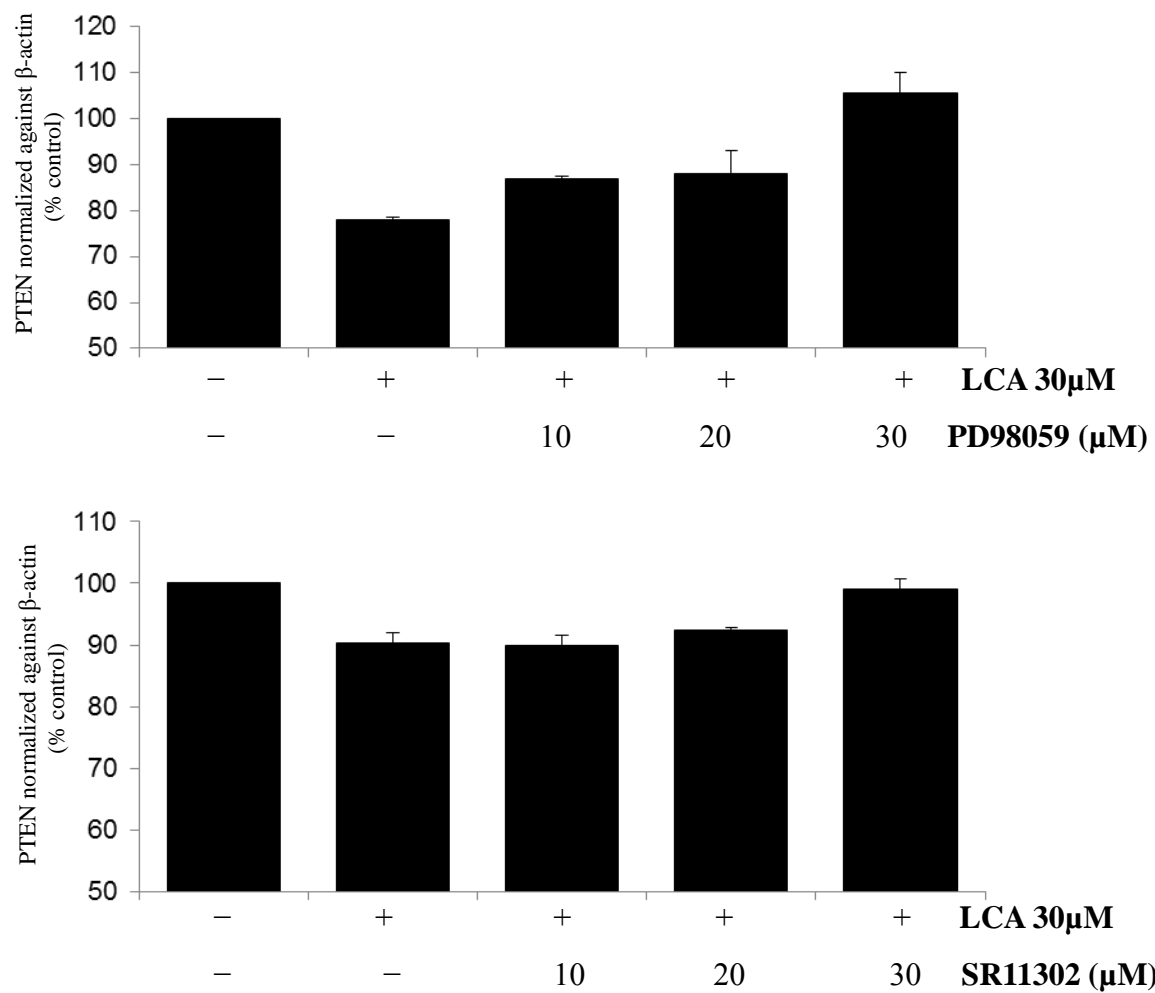

**Figure S6. Densitometric WB analysis of Figure 6B (A) and 6D (B).** The above data represent the means  $\pm$  SD from different experiments.
